# Supplementary material
Source: HighWire-hosted journal article supplement (https://ard.bmj.com/content/79/5/556)
Supplement: inline-supplementary-material-1 [file inline-supplementary-material-1.pdf]

## SUPPLEMENTAL MATERIAL

**Supplemental Figure 1:** Flow chart of participants during the 2-year trial. All randomized patients.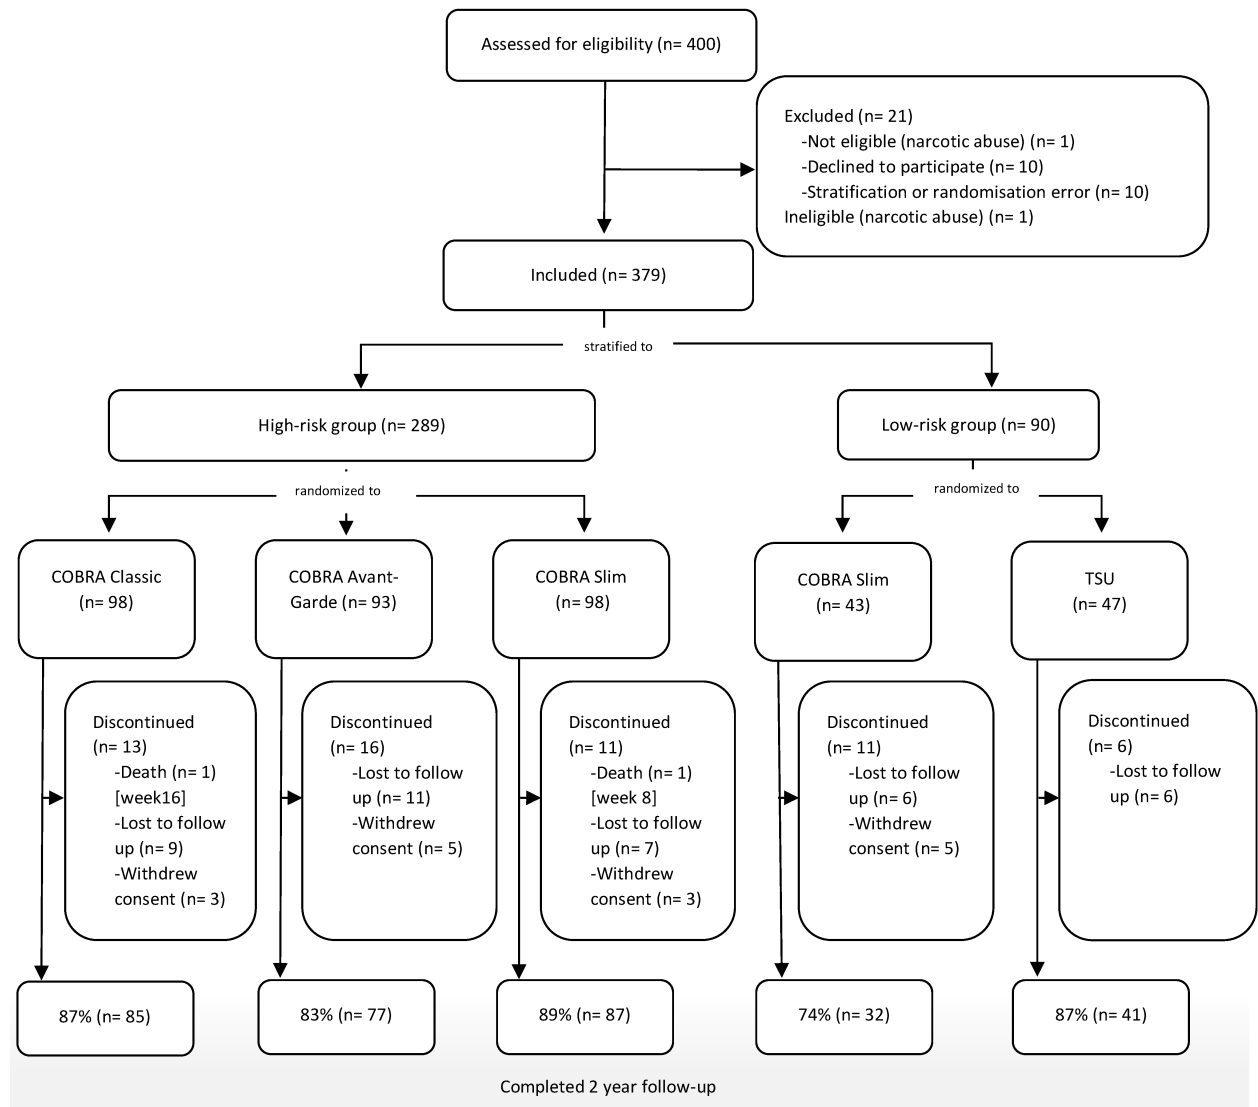

**Supplemental Table 1:** Average costs per patient (incurring in the resource) for the different categories of health care utilisation over the 2 years follow-up of complete cost cases (n=328) per treatment scheme.

| High-risk                        |                              |                              |                           |
|----------------------------------|------------------------------|------------------------------|---------------------------|
|                                  | COBRA Classic<br>n=88        | COBRA Avant-Garde<br>n=77    | COBRA Slim<br>n=88        |
| Health care                      | Mean costs € (SD)            |                              |                           |
| Rheumatologist consultations     | 839.63 (82.3)                | 853.26 (55.5) *              | 872.75 (90.4)             |
| Hospitalizations†                | 6 386.85 (6 575.1) [n=28]    | 6 131.87 (5 150.7) [n=21] ** | 6 813.47 (6 461.5) [n=24] |
| Laboratory (safety blood sample) | 201.05 (30.9)                | 208.05 (25.8) *              | 216.8 (22.4)              |
| RF                               | 8.68 (1.7)                   | 8.70 (1.6) *                 | 9.11 (1.0)                |
| Anti CCP                         | 42.63 (8.8)                  | 43.24 (8.0) *                | 45.47 (5.6)               |
| X-rays hands and feet            | 213.10 (35.1)                | 215.42 (28.7)                | 220.23 (26.2)             |
| Medication                       |                              |                              |                           |
| csDMARDs                         | 321.73 (144.4)*              | 559.82 (184.1) **            | 265.68 (163.0)            |
| MTX                              | 164.41 (76.9)                | 139.11 (59.9) **             | 184.81 (87.2)             |
| SSZ†                             | 125.44 (69.8) **             | -                            | 82.53 (25.4) [n=3]        |
| LEF†                             | 241.25 (174.4) [n=13]        | 422.93 (207.3) **            | 281.07 (144.3) [n=27]     |
| HCQ†                             | -                            | -                            | 43.03 (48.9) [n=2]        |
| GCS                              | 504.51 (320.8) **            | 293.88 (143.7)               | 292.78 (178.9)            |
| bDMARDs†                         | 10 482.98 (6 677.1) [n=17]** | 9 988.42 (5691.8) [n=13]     | 7 623.04 (2 671.3) [n=11] |
| Analgesics†                      | 89.72 (109.9) [n=73]         | 97.02 (140.8) [n=68]         | 141.69 (247.0) [n=76]     |
| Low-risk                         |                              |                              |                           |
|                                  | COBRA Slim<br>n=34           | Tight-Step-Up<br>n=41        |                           |
| Health care                      | Mean costs € (SD)            |                              |                           |
| Rheumatologist consultations     | 884.05 (62.7)                | 889.33 (84.1) *              |                           |
| Hospitalizations†                | 3 627.28 (2 778.4) [n=10]    | 4 302.19 (3 210.4) [n=8] **  |                           |
| Laboratory (safety blood sample) | 214.17 (22.7)                | 217.95 (27.6) *              |                           |
| RF                               | 8.84 (1.6)                   | 9.01 (1.0) *                 |                           |
| Anti CCP                         | 44.13 (7.2)                  | 44.98 (5.2) *                |                           |
| X-rays hands and feet            | 214.59 (28.3)                | 219.66 (24.1) *              |                           |
| Medication                       |                              |                              |                           |
| csDMARDs                         | 260.67 (178.5)               | 285.99 (196.9)               |                           |
| MTX                              | 191.96 (97.8)                | 181.69 (98.2)                |                           |
| SSZ†                             | -                            | 24.89 (0.7) [n=2] **         |                           |
| LEF†                             | 313.22 (143.5) [n=9]         | 307.99 (191.5) [n=15] **     |                           |
| GCS†                             | 266.88 (107.2)               | 104.01 (197.8) [n=23] **     |                           |
| bDMARDs†                         | 5 162.0 (3393.1) [n=7]       | 13 224.45 (9 861.5) [n=5] ** |                           |
| Analgesics†                      | 104.60 (243.5) [n=28]        | 205.67 (243.5) [n=38] *      |                           |

Data are expressed as mean and standard deviation unless otherwise specified.

\*p<0.05 \*\*p<0.001 in mean cost difference with Kruskal Wallis or Mann-Whitney U, taking COBRA Slim as reference

RF= rheumatoid factor, anti-CCP= anti-citrullinated peptide antibody, csDMARDs= conventional synthetic disease modifying anti-rheumatic drugs, MTX= methotrexate, SSZ= sulfasalazine, LEF= leflunomide, HCQ= hydroxychloroquine, GCS=glucocorticoids, bDMARDs= biological disease modifying anti-rheumatic drugs, Analgesics= including paracetamol, non-steroidals, tramadol and opioids

†Not everyone incurred in these resources and therefore the n is different.

**Supplemental Table 2:** Disutilities (EQ-5D) per adverse event with their reference cohort which was used for discounting. Lowest literature available disutility was assumed.

| Adverse event             | Disutility | Source of disutility/assumptions                        |
|---------------------------|------------|---------------------------------------------------------|
| Allergy                   | 0.02       | Olesen 2016                                             |
| Allergic rhinitis         | 0.03       | Al-Digheari 2018                                        |
| Alopecia                  | 0.031      | Hagiwara 2018                                           |
| Anaemia                   | 0.01       | Park 2015                                               |
| Angina                    | 0.04       | Sullivan 2006                                           |
| Anxiety disorders         | 0.04       | Sullivan 2005                                           |
| Aphthosis                 | 0.14       | Lloyd 2006-assumed same stomatitis                      |
| Arrhythmia                | 0.02       | ICER 2017                                               |
| Arthralgia                | 0.041      | Hagiwara 2018                                           |
| Arthritis                 | 0.04       | George 2014                                             |
| Arthrosis                 | 0.04       | Arrospide 2019                                          |
| Asthma                    | 0.11       | Hernandez 2018                                          |
| Back pain (chronic)       | 0.09       | Tsiplova 2016                                           |
| Blindness/low vision      | 0.05       | Sullivan 2006                                           |
| Bone marrow suppression   | 0.218      | Nafees 2008 assumed same as thrombocytopenia            |
| Breast cancer             | 0.12       | Wood 2017                                               |
| Cataract                  | 0.02       | Sullivan 2005 and 2006                                  |
| Cervicalgia               | 0.041      | Hagiwara 2018 assumed same as arthralgia                |
| Cholelithiasis            | 0.03       | Sullivan 2006                                           |
| COPD                      | 0.02       | Hong 2015                                               |
| COPD minor exacerbation   | 0.108      | Einarson 2015                                           |
| COPD major exacerbation   | 0.287      | Einarson 2015                                           |
| Cough                     | 0.05       | Doyle 2008                                              |
| Chronic bronchitis        | 0.04       | Sullivan 2011                                           |
| Cystitis                  | 0.218      | Stein 2017 assumed same as UTI                          |
| Depression                | 0.03       | Park 2019                                               |
| Diabetes                  | 0.06       | Nafees 2008 assumed as hyperglycaemia                   |
| Diarrhoea                 | 0.176      | Stein 2017                                              |
| Dyspepsia                 | 0.10       | Mahadeva 2010                                           |
| Dyspnoea                  | 0.219      | Lachaine 2015a                                          |
| Ear infection             | 0.218      | Stein 2017 assumed same as infection                    |
| Edema                     | 0.085      | Hagiwara 2018                                           |
| Eczema                    | 0.06       | Moberg 2009                                             |
| Fatigue                   | 0.115      | Lloyd 2006                                              |
| Fever                     | 0.15       | Lloyd 2006                                              |
| Fibromyalgia (very mild)  | 0.1        | Luo 2011                                                |
| Fractures of wrist or hip | 0.04       | Hagino 2009                                             |
| Fractures (all others)    | 0.07       | Matza 2014 assumed as surgery for stabilization of bone |
| Foot deformity (acquired) | 0.02       | Sullivan 2005                                           |
| Gastric ulcer             | 0.11       | Groeneveld 2001                                         |
| Gastritis                 | 0.01       | Sullivan 2005                                           |
| Gastroenteritis           | 0.04       | Sullivan 2006                                           |
| Hip/knee pain             | 0.17       | Kontodimopoulos 2009                                    |
| Hyperglycaemia            | 0.06       | Nafees 2008                                             |
| Hypertension              | 0.02       | ICER 2017                                               |
| Hypotension               | 0.02       | ICER 2017                                               |

|                                    |       |                                                                 |
|------------------------------------|-------|-----------------------------------------------------------------|
| Infection                          | 0.218 | Stein 2017                                                      |
| Interstitial lung disease          | 0.218 | Stein 2017 assumed same as pneumonitis or pulmonary infiltrates |
| Irritable bowel syndrome           | 0.13  | Akehurst 2002                                                   |
| Insomnia                           | 0.28  | Wu 2014                                                         |
| Knee replacement surgery           | 0.1   | Øystein 2013                                                    |
| Leucocytosis                       | 0.09  | Hagiwara 2018                                                   |
| Leukopenia                         | 0.09  | Nafees 2008                                                     |
| Liver disturbances                 | 0.16  | Arrospide 2019                                                  |
| Lower respiratory tract infection  | 0.218 | Stein 2017 assumed same as pneumonia                            |
| Migraine                           | 0.03  | Sullivan 2005, 2006 and 2011                                    |
| Myalgia                            | 0.123 | Hagiwara 2018                                                   |
| Mycosis                            | 0.218 | Stein 2017 same as fungal infection                             |
| Nausea                             | 0.051 | Nafees 2008                                                     |
| Neck/shoulder pain                 | 0.08  | Burstrom 2001                                                   |
| Neutropenia                        | 0.09  | Nafees 2008                                                     |
| Oesophagitis                       | 0.01  | Areia 20014                                                     |
| Oral mucositis                     | 0.087 | Hagiwara 2018                                                   |
| Osteoporosis                       | 0.03  | Guillemin 2013                                                  |
| Pain                               | 0.29  | Wu 2014                                                         |
| Pericarditis/pleuritis             | 0.218 | Stein 2017 assumed same as infection                            |
| Prolonged ileus/ bowel obstruction | 0.11  | Worbes-Cerezo 2019                                              |
| Prostatic disorder                 | 0.02  | Sullivan 2006                                                   |
| Pruritus                           | 0.03  | Sullivan 2011                                                   |
| Psoriasis                          | 0.02  | Sullivan 2011                                                   |
| Pulmonary embolism                 | 0.02  | Tavoly 2016                                                     |
| Renal cell carcinoma               | 0.09  | de Groot 2018                                                   |
| Renal insufficiency                | 0.15  | Park 2016                                                       |
| Renal/ureteral calculus            | 0.02  | Sullivan 2011                                                   |
| Septic bursitis                    | 0.218 | Stein 2017 assumed as sepsis                                    |
| Stomatitis                         | 0.14  | Tabberer 2006                                                   |
| Thrombocytopenia                   | 0.09  | Nafees 2008                                                     |
| Upper respiratory tract infection  | 0.218 | Stein 2017 assumed same as infection                            |
| Urinary tract infection            | 0.218 | Stein 2017                                                      |
| Urticaria                          | 0.03  | Sullivan 2011 assumed same as pruritus                          |

COPD=chronic obstructive pulmonary disease

UTI=urinary tract infection

ICER=The Institute of Clinical and Economic Review
